# Supplementary material for: A fusion peptide in preS1 and the human protein disulfide isomerase ERp57 are involved in hepatitis B virus membrane fusion process
Source: eLife. 2021 Jun 30;10:e64507. doi: 10.7554/eLife.64507 (PMC8282342; doi:10.7554/eLife.64507)
Supplement: Figure 1—source data 1. — The values correspond to the data expressed in the graphs displayed in Figure 1A, D and F. [file elife-64507-fig1-data1.xlsx]

## Sheet: Figure 1-source data 1
		WT					wt
		N-tat					h-tat
		pH 7	pH 4	pH 7	pH 4		pH 7	pH 4	pH7 (7N)	pH4 (7N)					mean		std
		63.087	27.0732	100	42.9141		46.8896	23.5803	74.3253	37.3774					N-tat	H-tat	N-tat	H-tat
		28.6121	25.2742	100	88.334		29.0579	28.5652	101.558	99.8359			Empty	pH7	4.08165	4.08165	1.07772	1.07772
		112.319	132.152	100	117.658		101.004	104.678	89.9265	93.1968				pH4	4.08165	4.08165	1.07772	1.07772
		90.8561	81.1388	100	89.3048		83.1938	89.7955	91.5666	98.8327			L	pH7	2.79598	2.37127	1.11816	0.244542
		545.333	542.54	100			481.033	433.409	88.2089	79.476				pH4	1.78681	2.62236	0.0176612	0.126468
		9.67748	10.5257	100	108.764		8.59744	12.1714	88.8397	125.77			M	pH7	4.02843	4.95595	0.622622	0.937461
		35.56	32.3746	100	91.0421		32.1252	31.6686	90.3409	89.0566				pH4	3.00475	4.17448	0.386747	0.399923
		39.4669	44.3494	100	112.371		43.0719	43.213	109.134	109.492			S	pH7	11.1524	11.1099	1.36803	0.944459
		14.7339	14.2283	100	96.5683		12.5296	14.2844	85.0388	96.9487				pH4	9.99729	9.28697	0.835227	0.823854
		32.491	38.0497	100	117.109		33.1654	33.6899	102.076	103.69			noM	pH7	101.323	95.0949	0.55428	4.95287
		8.73064	9.36743	100	107.294		8.92444	8.79385	102.22	100.724				pH4	99.0057	96.7864	2.76496	0.723351
		38.2591	38.9403	100	101.78		39.802	41.3657	104.033	108.12			Wt	pH7	100	95.722	0	7.76571
	mean	84.9272	83.0012	100	103.023		76.6162	72.1012	95.722	100.468				pH4	102.701	100.468	10.2392	11.4011
	std	142.078	142.443	0	10.6859		124.833	112.546	7.76571	11.4011
		L					L
		N-tat					H-tat
		pH 7	pH 4	pH7 (7Nwt)	pH7 (7Nwt)		pH 7	pH 4	pH7 (7Nwt)	pH4 (7Nwt)
		2.34783	1.14259	3.72157	1.81113		1.68803	1.75026	2.67572	2.77436
		0.98527	0.509183	3.44354	1.77961		0.675567	0.705213	2.36112	2.46474
		1.37347	1.98771	1.22283	1.76971		2.33284	2.95173	2.07698	2.62799
				2.79598	1.78681				2.37127	2.62236
				1.11816	0.0176612				0.244542	0.126468
		M					M
		N-tat					H-tat
		pH 7	pH 4	pH7 (7Nwt)	pH7 (7Nwt)		pH 7	pH 4	pH7 (7Nwt)	pH4 (7Nwt)
		2.96925	1.55703	4.70659	2.46808		3.96293	2.88667	6.2817	4.57571
		1.19476	0.962635	4.17572	3.36443		1.2267	1.23578	4.28735	4.31909
		3.59755	3.57371	3.20298	3.18175		4.82836	4.07567	4.2988	3.62866
				4.02843	3.00475				4.95595	4.17448
				0.622622	0.386747				0.937461	0.399923
		S					S
		N-tat					H-tat
		pH 7	pH 4	pH7 (7Nwt)	pH7 (7Nwt)		pH 7	pH 4	pH7 (7Nwt)	pH4 (7Nwt)						mean		std
		6.16119	5.97338	9.76618	9.46849		7.38301	5.42812	11.7029	8.60419						N-tat	H-tat	N-tat	H-tat
		3.79542	3.25776	13.2651	11.3859		3.52645	2.49408	12.325	8.71685				Empty	pH7	4.08165	4.08165	1.07772	1.07772
		12.845	10.3796	11.4362	9.2412		11.2052	11.9822	9.97626	10.668					pH4	4.08165	4.08165	1.07772	1.07772
		4.0028	3.90467	10.1422	9.89354		4.1186	3.6147	10.4356	9.15881				VSV	pH7	20.3982	14.3317	2.0643	1.24558
				11.1524	9.99729				11.1099	9.28697					pH5	43.5477	51.6535	3.17904	5.91553
				1.36803	0.835227				0.944459	0.823854				CCHFV	pH7	11.7569	10.7434	0.6256	2.95461
															pH4	75.4766	76.5448	8.25382	7.06601
														HBV	pH7	100	95.722	0	7.76571
		noM					noM								pH4	102.701	100.468	10.2392	11.4011
		N-tat					H-tat
		pH 7	pH 4	pH7 (7Nwt)	pH7 (7Nwt)		pH 7	pH 4	pH7 (7Nwt)	pH4 (7Nwt)
		32.7406	33.0663	100.768	101.771		29.288	31.6819	90.142	97.5098
		8.89451	8.40244	101.877	96.2408		8.73481	8.38692	100.048	96.0631
				101.323	99.0057				95.0949	96.7864
				0.55428	2.76496				4.95287	0.723351
		CCHF					CCHF
		N-tat					H-tat
		pH 7	pH 4	pH7 (7Nwt)	pH4 (7Nwt)		pH 7	pH 4	pH7 (7Nwt)	pH4 (7Nwt)
		7.35313	47.0342	11.6555	74.5546		10.2903	23.6139	16.3114	87.2223
		2.99836	26.9272	10.4794	94.1111		2.92695	20.6979	10.2298	81.8932
		13.796	77.7359	12.2829	69.21		9.38744	88.1108	8.35785	66.6736
		10.7475	63.0583	11.8292	69.4047		12.3276	58.4468	13.5683	72.0331
		65.2078	374.059	11.9574	68.5927		55.9689	370.842	10.2633	68.353
		1.21915	7.23843	12.5978	74.7966		0.922742	8.45625	9.53494	80.3395
		4.08799	27.6182	11.496	77.6665		2.4672	25.6728	6.93812	79.299
				11.7569	75.4766				10.7434	76.5448
				0.6256	8.25382				2.95461	7.06601
			Total protein expression
								Mean	std
				L	1.00093	0.883231	0.74253	0.875563	0.105629
				M	1.1233	1.13537	0.985321	1.08133	0.0680668
				S	0.97094	0.954186	0.945235	0.956787	0.010654
				noM	1.16242	0.995892	0.863433	1.00725	0.122324
				Wt	1	1	1	1	0
			Biotinylated protein expression
								Mean	std
				L	0.866885	1.0612	0.606556	0.84488	0.186258
				M	0.997666	1.303	0.987204	1.09596	0.146463
				S	0.843539	0.937076	0.769127	0.849914	0.0687132
				noM	0.947313	1.03182	0.845116	0.941415	0.0763342
				Wt	1	1	1	1	0
