# Supplementary material for: A fusion peptide in preS1 and the human protein disulfide isomerase ERp57 are involved in hepatitis B virus membrane fusion process
Source: eLife. 2021 Jun 30;10:e64507. doi: 10.7554/eLife.64507 (PMC8282342; doi:10.7554/eLife.64507)
Supplement: Figure 1—source data 2. — These images are of the original and uncropped gels that correspond to the blots displayed in Figure 1E. The vertical bars correspond to samples that are not described in the 'Results' section. [file elife-64507-fig1-data2.xlsx]

## Sheet: Figure 1-source data 2
	Original files of the full raw unedited gels:
	Figures with the uncropped gels with the relevant bands labelled:
