# Supplementary material for: A fusion peptide in preS1 and the human protein disulfide isomerase ERp57 are involved in hepatitis B virus membrane fusion process
Source: eLife. 2021 Jun 30;10:e64507. doi: 10.7554/eLife.64507 (PMC8282342; doi:10.7554/eLife.64507)
Supplement: Figure 2—source data 1. — The values correspond to the data expressed in the graphs displayed in Figure 2C, D, E, F, I and J. [file elife-64507-fig2-data1.xlsx]

## Sheet: Figure 2-source data 1
Production peptide PreS1
					Mean	std
	Wt	100.076	100.112	99.9707	100.053	0.0597906
	F52A	85.2698	91.6851	88.8839	88.6129	2.62602
	G53A	88.2176	95.1098	90.3397	91.2224	2.88213
	F56A	84.285	108.904	98.2214	97.1367	10.0797
	W66A	89.7819	102.223	88.7981	93.601	6.1099
	FW/AA	88.8567	92.1825	88.2934	89.7775	1.71604
	FW/EE	86.7205	88.3104	87.3684	87.4664	0.652753
	noGP	1.11822	1.08713	1.10212	1.10249	0.0126959
Production peptide PreS2
					Mean	std
	Wt	100	100.227	99.9269	100.051	0.127993
	Y129A	106.164	86.9573	88.1672	93.763	8.78301
	F130A	85.4545	105.706	94.6965	95.2857	8.27816
	S136E	85.7064	106.183	92.5779	94.8223	8.50877
	L144A	102.342	84.1271	95.0505	93.8399	7.48532
	noGP	0.0101609	0.0810407	0.0217463	0.0376493	0.0310447
Infectivity peptide PreS1
					Mean	std
	Wt	100.222	100	99.965	100.062	0.113988
	F52A	7.56587	5.63163	5.69395	6.29715	0.897483
	G53A	92.7195	89.1362	87.2175	89.6911	2.28016
	F56A	3.56587	2.63163	3.69395	3.29715	0.47349
	W66A	5.32135	6.22831	6.48088	6.01018	0.497873
	FW/AA	6.29655	2.11792	6.47531	4.96326	2.01328
	FW/EE	5.58226	6.7417	6.1617	6.16189	0.473339
	noGP	0.10702	0.273772	0.148588	0.17646	0.0708721
Infectivity peptide PreS2
					Mean	std
	Wt	99.9361	100.185	100.064	100.062	0.101529
	Y129A	110.936	108.386	97.9881	105.77	5.60035
	F130A	107.902	93.6154	109.004	103.507	7.00902
	S136E	91.4217	109.082	85.654	95.3859	9.96683
	L144A	87.5519	113.071	96.1554	98.9262	10.6009
	noGP	0.324454	1.2164	0.178692	0.573184	0.458702
Pres1 Total protein expression
					Mean	std
	Wt	1	1	1	1	0
	F52A	0.78298	0.844674	1.11517	0.914276	0.144272
	G53A	0.602874	0.749585	0.960894	0.771118	0.146952
	F56A	0.77343	0.769454	0.918548	0.820477	0.0693655
	W66A	0.874353	0.704857	0.811984	0.797065	0.0699957
	FW/AA	0.766501	0.663192	0.899167	0.776287	0.0965843
	FW/EE	0.749685	0.764384	0.895845	0.803304	0.0657106
Pres1 Biotinilation protein expression
					Mean	std
	Wt	1	1	1	1	0
	F52A	1.10535	1.20059	0.965156	1.09037	0.0966983
	G53A	0.924016	0.766591	0.872301	0.854303	0.0655164
	F56A	1.13438	1.12255	0.984361	1.08043	0.0681019
	W66A	1.08436	1.01904	0.864945	0.989449	0.0919879
	FW/AA	0.871301	0.845819	0.728217	0.815112	0.062319
	FW/EE	0.854186	0.73595	0.880506	0.823547	0.0628657
Pres2 Total protein expression
					Mean	std
	Wt	1	1	1	1	0
	Y129A	0.936339	0.734229	0.862127	0.844232	0.0834755
	F130A	0.685933	0.791303	0.895515	0.790917	0.0855618
	S136E	0.831954	0.696657	0.953428	0.827346	0.104877
	L144A	0.908531	0.694487	0.956614	0.853211	0.113939
Pres2 Biotinilation protein expression
					Mean	std
	Wt	1	1	1	1	0
	Y129A	1.23845	1.01811	0.958684	1.07175	0.120346
	F130A	0.803598	0.900385	0.962022	0.888668	0.0652051
	S136E	1.01484	0.971411	0.923766	0.970004	0.0371923
	L144A	1.17841	1.06896	0.925873	1.05775	0.103403
