# Supplementary material for: A fusion peptide in preS1 and the human protein disulfide isomerase ERp57 are involved in hepatitis B virus membrane fusion process
Source: eLife. 2021 Jun 30;10:e64507. doi: 10.7554/eLife.64507 (PMC8282342; doi:10.7554/eLife.64507)
Supplement: Figure 2—source data 2. — The values correspond to the data expressed in the graphs displayed in Figure 2G. [file elife-64507-fig2-data2.xlsx]

## Sheet: Figure 2-source data 2
		Empty										mean		std
		N-tat			h-tat							N-tat	H-tat	N-tat	H-tat
		pH 7	pH 4		pH7 (7N)	pH4 (7N)				WT	pH7	100	105.008	1.48803e-07	3.60823
	20190904	2.61375	2.61375		2.61375	2.61375					pH4	102.651	101.405	9.7662	6.75496
	20191004	3.20176	3.20176		3.20176	3.20176				F52A	pH7	2.36851	1.79743	0.380366	0.200751
	20190826	7.85506	7.85506		7.85506	7.85506					pH4	2.03856	1.7285	0.349377	0.726019
	20190805	3.07778	3.07778		3.07778	3.07778				G53A	pH7	101.999	95.8052	6.44148	0.723259
	20191104	0.922013	0.922013		0.922013	0.922013					pH4	99.6108	103.92	5.4002	9.58232
	mean	3.53407	3.53407		3.53407	3.53407				F56A	pH7	1.50814	1.7841	0.149525	0.216948
	std	2.30909	2.30909		2.30909	2.30909					pH4	1.65463	1.56522	0.0701034	0.120908
										W66A	pH7	10.6448	10.2388	1.6019	2.71049
											pH4	9.97174	11.4731	1.69551	1.94445
										FW/AA	pH7	2.78436	4.001	1.06315	2.11571
		WT									pH4	3.34156	4.78179	1.04008	2.13722
		N-tat			h-tat					FW/EE	pH7	5.1072	4.76071	2.30227	2.62039
		pH 7	pH 4		pH7 (7N)	pH4 (7N)					pH4	5.41581	6.44667	2.3977	2.68986
	20190909	100	101.78		104.033	108.12				Empty	pH7	3.53407	3.53407	2.30909	2.30909
	20191004	100	95.8812		111.539	94.1802					pH4	3.53407	3.53407	2.30909	2.30909
	20190826	100	89.2918		101.522	92.6414
	20190805	100	117.109		102.076	103.69
	20191104	100	109.194		105.87	108.394
	mean	100	102.651		105.008	101.405
	std	1.48803e-07	9.7662		3.60823	6.75496
		F52A
		N-tat			h-tat
		pH 7	pH 4		pH7 (7N)	pH4 (7N)
	20191104	1.83717	1.6164		1.91029	1.61767
	20191118	2.56153	2.47197		1.9666	2.6679
	20191216	2.70683	2.02731		1.51539	0.899916
	mean	2.36851	2.03856		1.79743	1.7285
	std	0.380366	0.349377		0.200751	0.726019
		W66A
		N-tat			h-tat
		pH 7	pH 4		pH7 (7N)	pH4 (7N)
	20191201	11.699	11.8187		7.54368	10.854
	20191104	12.1232	9.37442		9.28951	10.1831
	20191118	8.00732	7.48277		9.36079	10.0557
	20191004	10.7495	11.211		14.7611	14.7998
	mean	10.6448	9.97174		10.2388	11.4731
	std	1.6019	1.69551		2.71049	1.94445
									FW/AA
									N-tat			h-tat
		FW/EE							pH 7	pH 4		pH7 (7N)	pH4 (7N)
		N-tat			h-tat			20191104	1.99977	1.70256		0.811948	1.10291
		pH 7	pH 4		pH7 (7N)	pH4 (7N)		20191118	4.57888	4.37256		5.70278	6.31889
	20190909	2.71217	3.09506		2.63173	2.9751		20191209	1.98338	4.0888		3.37845	5.6522
	20191004	7.70668	7.88046		2.84556	9.6644		20191216	2.5754	3.20232		6.1108	6.05314
	20191104	2.78681	2.85639		3.60072	4.50768		mean	2.78436	3.34156		4.001	4.78179
	20191118	7.95204	8.60049		9.73393	9.49335		std	1.06315	1.04008		2.11571	2.13722
	20191216	4.37828	4.64667		4.99161	5.59283
	mean	5.1072	5.41581		4.76071	6.44667
	std	2.30227	2.3977		2.62039	2.68986
		G53A
		N-tat			h-tat
		pH 7	pH 4		pH7 (7N)	pH4 (7N)
	20191209	110.998	106.827		95.2794	117.223
	20191216	98.7297	98.1671		95.3083	95.0306
	20191118	96.2707	93.838		96.8279	99.5065
	mean	101.999	99.6108		95.8052	103.92
	std	6.44148	5.4002		0.723259	9.58232
		F56A
		N-tat			h-tat
		pH 7	pH 4		pH7 (7N)	pH4 (7N)
	20191209	1.70275	1.60482		1.9539	1.50484
	20191216	1.33921	1.6053		1.4779	1.45686
	20191118	1.48245	1.75377		1.9205	1.73395
	mean	1.50814	1.65463		1.7841	1.56522
	std	0.149525	0.0701034		0.216948	0.120908
