# Supplementary material for: A fusion peptide in preS1 and the human protein disulfide isomerase ERp57 are involved in hepatitis B virus membrane fusion process
Source: eLife. 2021 Jun 30;10:e64507. doi: 10.7554/eLife.64507 (PMC8282342; doi:10.7554/eLife.64507)
Supplement: Figure 2—source data 3. — The values correspond to the data expressed in the graphs displayed in Figure 2H. [file elife-64507-fig2-data3.xlsx]

## Sheet: Figure 2-source data 3
		empty
		N-tat			h-tat
		pH 7	pH 4		pH7 (7N)	pH4 (7N)
	20191125	2.40878	2.40878		2.40878	2.40878						mean		std
	20191209	3.64655	3.64655		3.64655	3.64655						N-tat	H-tat	N-tat	H-tat
	20191216	1.90402	1.90402		1.90402	1.90402				Wt	pH7	100	110.912	1.16031e-14	1.19032
	mean	2.65312	2.65312		2.65312	2.65312					pH4	97.4885	110.029	14.7869	2.16841
	std	0.732067	0.732067		0.732067	0.732067				Y129A	pH7	97.7403	109.907	11.9748	0.555709
											pH4	98.4015	106.368	9.01131	7.16267
										F130A	pH7	100.286	103.015	4.14753	8.36784
											pH4	109.154	106.827	6.81621	3.13713
										S136E	pH7	93.4826	97.5529	8.85043	5.68289
		Wt									pH4	95.8604	84.7737	8.37996	9.53709
		N-tat			h-tat					L144A	pH7	95.9641	103.443	8.1784	5.04124
		pH 7	pH 4		pH7 (7N)	pH4 (7N)					pH4	95.8078	102.404	13.1651	7.24409
	20191125	100	99.3189		111.297	112.859				Empty	pH7	2.65312	2.65312	0.732067	0.732067
	20191209	100	114.614		112.138	109.636					pH4	2.65312	2.65312	0.732067	0.732067
	20191216	100	78.5326		109.3	107.591
	mean	100	97.4885		110.912	110.029
	std	1.16031e-14	14.7869		1.19032	2.16841
		Y129A
		N-tat			h-tat
		pH 7	pH 4		pH7 (7N)	pH4 (7N)
	20191125	114.653	111.137		109.51	116.498
	20191209	88.5382	91.6296		110.693	101.297
	20191216	90.0295	92.4381		109.518	101.31
	mean	97.7403	98.4015		109.907	106.368
	std	11.9748	9.01131		0.555709	7.16267
		F130A
		N-tat			h-tat
		pH 7	pH 4		pH7 (7N)	pH4 (7N)
	20191125	106.118	115.954		98.7258	102.74
	20191209	96.8279	111.672		114.711	107.375
	20191216	97.9123	99.8368		95.6084	110.366
	mean	100.286	109.154		103.015	106.827
	std	4.14753	6.81621		8.36784	3.13713
		S136E
		N-tat			h-tat
		pH 7	pH 4		pH7 (7N)	pH4 (7N)
	20190909	89.1426	91.7398		96.63	88.8238
	20190826	81.2325	84.2337		94.5982	81.3664
	20190805	103.622	105.275		106.978	97.4063
	20191216	99.9339	102.193		92.0056	71.4986
	mean	93.4826	95.8604		97.5529	84.7737
	std	8.85043	8.37996		5.68289	9.53709
		L144A
		N-tat			h-tat
		pH 7	pH 4		pH7 (7N)	pH4 (7N)
	20191125	106.275	90.4832		105.45	107.711
	20191209	86.2707	113.921		108.364	107.339
	20191216	95.3465	83.0197		96.5147	92.1617
	mean	95.9641	95.8078		103.443	102.404
	std	8.1784	13.1651		5.04124	7.24409
