# Supplementary material for: A fusion peptide in preS1 and the human protein disulfide isomerase ERp57 are involved in hepatitis B virus membrane fusion process
Source: eLife. 2021 Jun 30;10:e64507. doi: 10.7554/eLife.64507 (PMC8282342; doi:10.7554/eLife.64507)
Supplement: Figure 3—source data 1. — The values correspond to the data expressed in the graphs displayed in Figure 3A and B. [file elife-64507-fig3-data1.xlsx]

## Sheet: Figure 3-source data 1
			2019.04.08	2019.01.28	2019.01.29	2019.04.24
			0h				Mean	std
	HBV	0 mM	100	100	100	100	100	0			DTNB	0H	16h	0h std	16h std
		0.5 mM	81.885	86.5871	83.0942	82.6416	83.552	1.80483			0 mM	100	100	0	0
		1 mM	60.9111	59.8568	54.5356	49.638	56.2354	4.51087			0.5 mM	83.552	85.3604	1.80483	8.17194
		2 mM	14.5728	24.5728	21.1119	25.2284	21.3715	4.22534			1 mM	56.2354	82.9102	4.51087	3.34046
											2 mM	21.3715	83.9658	4.22534	4.87997
			2019.04.24	2019.01.29	20200706
			16h	16h	16h	Mean	std
	HBV	0 mM	100	100	100	100	0
		0.5 mM	96.3077	83.0942	76.6792	85.3604	8.17194
		1 mM	86.6426	83.552	78.5361	82.9102	3.34046
		2 mM	84.5341	89.638	77.7252	83.9658	4.87997
	Infectivity in DTNB at 0h and 16h
		20190506	20190620	20190805	20200804	20200807	mean	std
		0H
	0 mM	646221	2.04222e+06	1.66329e+06	1.754e+06	2.10608e+06	1.64236e+06	525379
	0.125 mM	432015			637338	1.22777e+06	765707	337307
	0.25 mM	83479.1			329707	333959	249048	117088
	0.5 mM	42321.9			126956	227199	132159	75565.2
	1 mM	4707.94	4837.02	5672.63	39516.9	35563.9	18059.7	15958.4
		20190506	20190620	20190805	20200804	20200807	mean	std
		16H
	0 mM	616039	2.04222e+06	1.66329e+06	1.24891e+06	1.95471e+06	1.50503e+06	523781
	0.125 mM	506470			2.74128e+06	1.43142e+06	1.55972e+06	916858
	0.25 mM	240336			1.79535e+06	3.66876e+06	1.90148e+06	1.40166e+06
	0.5 mM	809231			1.94869e+06	2.65698e+06	1.80497e+06	761155
	1 mM	845360	1.10407e+06	1.33378e+06	1.74575e+06	1.33064e+06	1.27192e+06	297293
		mean		STD
	DTNB	0H	16H	0H	16H
	0 mM	1.64236e+06	1.50503e+06	525379	523781
	0.125 mM	765707	1.55972e+06	337307	916858
	0.25 mM	249048	1.90148e+06	117088	1.40166e+06
	0.5 mM	132159	1.5622e+06	75565.2	1.0866e+06
	1 mM	18059.7	1.11976e+06	15958.4	557508
	DTNB kinetics
		Wt			mean	std				Wt	VSV-∆p	noGP
	input	3.33613e+07	1.14221e+08	7.37909e+07	7.37909e+07	3.30107e+07			input	7.37909e+07	3.37019e+07	4188.27
	DTNB(-)	1.02489e+06	2.30168e+06	1.66329e+06	1.66329e+06	521246			DTNB(-)	1.66329e+06	1.42098e+06	3641.45
	0h	2109.49	9235.77	5672.63	5672.63	2909.29			0h	5672.63	2.54329e+07	4576.97
	1h	26996.8	17207.4	22102.1	22102.1	3996.51			1h	22102.1	1.99432e+06	3027.74
	2h	40480.9	7013.18	23747	23747	13663.1			2h	23747	6.898e+06	3356.84
	4h	416657	329462	373060	373060	35596.9			4h	373060	5.46009e+06	3727.81
	16h	1.35526e+06	1.3123e+06	1.33378e+06	1.33378e+06	17538.7			16h	1.33378e+06	1.42619e+06	18788.3
		VSV-∆p			mean	std
	input	3.2633e+07	3.47708e+07	3.37019e+07	3.37019e+07	872739
	DTNB(-)	1.0425e+06	1.79946e+06	1.42098e+06	1.42098e+06	309027
	0h	1.48054e+06	4.93852e+07	2.54329e+07	2.54329e+07	1.9557e+07
	1h	2.96673e+06	1.02191e+06	1.99432e+06	1.99432e+06	793966
	2h	1.31906e+06	1.24769e+07	6.898e+06	6.898e+06	4.55518e+06
	4h	1.73205e+06	9.18813e+06	5.46009e+06	5.46009e+06	3.04393e+06
	16h	1.23605e+06	1.61632e+06	1.42619e+06	1.42619e+06	155242
		NoGP			mean	std
	input	4611.06	1819.98	6133.76	4188.27	1786.29
	DTNB(-)	4736.99	3470.57	2716.8	3641.45	833.543
	0h	4518.3	3098.58	6114.03	4576.97	1231.75
	1h	4064.31	1154.49	3864.41	3027.74	1327.09
	2h	5297.7	639.823	4132.99	3356.84	1979.19
	4h	1911.41	4210.88	5061.14	3727.81	1330.47
	16h	2333.69	2728.2	51302.9	18788.3	22991.9
