# Supplementary material for: A fusion peptide in preS1 and the human protein disulfide isomerase ERp57 are involved in hepatitis B virus membrane fusion process
Source: eLife. 2021 Jun 30;10:e64507. doi: 10.7554/eLife.64507 (PMC8282342; doi:10.7554/eLife.64507)
Supplement: Figure 3—source data 3. — These images are of the original and uncropped gels that correspond to the blots displayed in Figure 3D. [file elife-64507-fig3-data3.xlsx]

## Sheet: Figure 3-source data 3
	Original files of the full raw unedited gels:
	Figures with the uncropped gels with the relevant bands labelled:
