# Supplementary material for: A fusion peptide in preS1 and the human protein disulfide isomerase ERp57 are involved in hepatitis B virus membrane fusion process
Source: eLife. 2021 Jun 30;10:e64507. doi: 10.7554/eLife.64507 (PMC8282342; doi:10.7554/eLife.64507)
Supplement: Figure 5—source data 1. — The values correspond to the data expressed in the graphs displayed in Figure 5A–C. [file elife-64507-fig5-data1.xlsx]

## Sheet: Figure 5-source data 1
		Infectivity
							mean
		noGP	4639.78	2777.22	3247.89	2099.69	3191.14	930.639
		Wt	2.56809e+06	2.07214e+06	2.45365e+06	3.44519e+06	2.63477e+06	502639
		T303C	7.20979e+06	888850	197672	253858	2.13754e+06	2.94102e+06
		G308C	1.54869e+06	1.50166e+06	669206	563334	1.07072e+06	456295
		TG/CC	2296.36	2007.8	3746.35	1605.73	2414.06	807.354
		particle production
							mean	std
		noGP	7193.49	49183.2	31535.3	48483.2	34098.8	17065.5
		Wt	6.59529e+09	1.72662e+09	4.42346e+08	3.16045e+09	2.98118e+09	2.29747e+09
		T303C	4.37615e+07	1.01078e+09	1.71664e+09	8.59817e+08	9.0775e+08	5.94493e+08
		G308C	8.70209e+07	4.08498e+09	3.83773e+09	2.05622e+09	2.51649e+09	1.60624e+09
		TG/CC	6.17689e+08	1.33318e+09	2.59106e+09	1.30804e+09	1.46249e+09	7.12029e+08
TGCC Total protein expression
					Mean	std
	wt	1	1	1	1	0
	T303C	1.1316	0.838637	0.992435	0.987558	0.119652
	G308C	1.35305	0.968183	1.01803	1.11309	0.170896
	TG/CC	1.17224	0.986463	1.24511	1.1346	0.108894
TGCC Biotinilated protein expression
					Mean	std
	wt	1	1	1	1	0
	T303C	0.930871	0.971135	0.982049	0.961352	0.0220087
	G308C	0.789302	0.935715	0.952381	0.892466	0.0732645
	TG/CC	0.863808	0.944664	0.968532	0.925668	0.0448138
