# Supplementary material for: A fusion peptide in preS1 and the human protein disulfide isomerase ERp57 are involved in hepatitis B virus membrane fusion process
Source: eLife. 2021 Jun 30;10:e64507. doi: 10.7554/eLife.64507 (PMC8282342; doi:10.7554/eLife.64507)
Supplement: Figure 5—source data 2. — The values correspond to the data expressed in the graphs displayed in Figure 5D. [file elife-64507-fig5-data2.xlsx]

## Sheet: Figure 5-source data 2
		WT
		N-tat			h-tat
		pH 7	pH 4		pH7 (7N)	pH4 (7N)
	2019.10.21	100	102.24		96.2412	94.6362
	2020.02.17	100	102.727		107.795	107.788
	2020.07.06	100	90.9922		91.6961	98.7432
	2020.08.17	100	95.5459		97.056	93.9319
	mean	100	97.8763		98.197	98.7749
	std	0	4.88349		5.90558	5.51872
		T303C
		N-tat			h-tat
		pH 7	pH 4		pH7 (7N)	pH4 (7N)
	2019.10.21	98.2563	103.627		85.3451	98.9121
	2020.02.07	74.2102	73.5628		88.3246	84.0245
	2020.07.06	71.2893	72.0699		76.402	73.3447
	2020.08.17	93.3794	111.525		116.842	108.394
	mean	84.2838	90.1962		91.7286	91.1687
	std	11.7078	17.6106		15.1488	13.4665
		G308C
		N-tat			h-tat
		pH 7	pH 4		pH7 (7N)	pH4 (7N)						mean		std
	2019.10.21	105.786	98.9664		90.9803	93.5111						N-tat	H-tat	N-tat	H-tat
	2020.02.07	92.4294	99.7163		86.0534	94.1081				Empty	pH7	4.08165	4.08165	1.07772	1.07772
	2020.07.06	108.942	114.081		122.747	120.806					pH4	4.08165	4.08165	1.07772	1.07772
	2020.08.17	104.088	105.998		114.117	113.264				Wt	pH7	100	98.197	0	5.90558
	mean	102.811	104.69		103.474	105.422					pH4	97.8763	98.7749	4.88349	5.51872
	std	6.24186	6.07025		15.3645	11.9167				T303C	pH7	84.2838	91.7286	11.7078	15.1488
											pH4	90.1962	91.1687	17.6106	13.4665
										G308C	pH7	102.811	103.474	6.24186	15.3645
											pH4	104.69	105.422	6.07025	11.9167
										TG/CC	pH7	10.3539	11.5078	4.26483	4.29262
											pH4	12.5007	11.6994	3.66275	4.47451
		TG/CC
		N-tat			h-tat
		pH 7	pH 4		pH7 (7N)	pH4 (7N)
	2019.10.21	4.19658	6.7948		5.92197	4.06623
	2020.02.07	10.1769	12.2362		11.8405	13.9336
	2020.07.06	10.8052	14.2184		10.3532	13.3372
	2020.08.17	16.2367	16.7534		17.9157	15.4605
	mean	10.3539	12.5007		11.5078	11.6994
	std	4.26483	3.66275		4.29262	4.47451
		Empty
		N-tat			h-tat
		pH 7	pH 4		pH7 (7N)	pH4 (7N)
	2019.10.21	5.21724	5.21724		5.21724	5.21724
	2020.02.07	2.54824	2.54824		2.54824	2.54824
	2020.07.06	3.60015	3.60015		3.60015	3.60015
	2020.08.17	4.96096	4.96096		4.96096	4.96096
	mean	4.08165	4.08165		4.08165	4.08165
	std	1.07772	1.07772		1.07772	1.07772
