# Supplementary material for: A fusion peptide in preS1 and the human protein disulfide isomerase ERp57 are involved in hepatitis B virus membrane fusion process
Source: eLife. 2021 Jun 30;10:e64507. doi: 10.7554/eLife.64507 (PMC8282342; doi:10.7554/eLife.64507)
Supplement: Figure 6—source data 1. — The values correspond to the data expressed in the graphs displayed in Figure 6A–D. [file elife-64507-fig6-data1.xlsx]

## Sheet: Figure 6-source data 1
Binding n=3
	Wt NTCP			mean	std		wt Huh7			mean	std		TG/CC NTCP			mean	std		TG/CC Huh7			mean	std
DMSO	2.53515e+06	2.81164e+06	1.72156e+06	2.35612e+06	462681		972553	3.66304e+06	806350	1.81398e+06	1.30924e+06		2.37307e+06	1.15202e+06	1.56255e+06	1.69588e+06	507330		2.43699e+06	2.42818e+06	1.09543e+06	1.98687e+06	630354
NTZ	2.26606e+06	1.23315e+06	1.03375e+06	1.51099e+06	540090		393137	2.54052e+06	2.12701e+06	1.68689e+06	930267		1.68596e+06	994548	1.74026e+06	1.47359e+06	339458		2.47711e+06	3.06323e+06	1.532e+06	2.35745e+06	630821
PX-12	2.2247e+06	1.04915e+06	1.40019e+06	1.55801e+06	492722		939768	1.57799e+06	1.74938e+06	1.42238e+06	348357		1.27536e+06	1.67421e+06	1.07479e+06	1.34145e+06	249138		2.12556e+06	2.76632e+06	3.26241e+06	2.7181e+06	465370
Bacitracin	2.01051e+06	1.9666e+06	1.61211e+06	1.86307e+06	178360		1.33625e+06	3.27725e+06	617642	1.74371e+06	1.12336e+06		1.12323e+06	1.30908e+06	1.81616e+06	1.41616e+06	292842		3.17289e+06	1.98651e+06	1.36315e+06	2.17418e+06	750649
EGCG	1.56545e+06	2.92914e+06	1.90351e+06	2.1327e+06	579830		5.21221e+06	753714	861825	2.27592e+06	2.07674e+06		1.26151e+06	1.18986e+06	1.92568e+06	1.45901e+06	331277		4.40834e+06	3.10008e+06	1.03895e+06	2.84913e+06	1.38695e+06
Rutin	2.5585e+06	1.30512e+06	2.27885e+06	2.04749e+06	537207		1.6273e+06	4.62474e+06	1.53184e+06	2.59463e+06	1.43604e+06		904479	1.77114e+06	1.40766e+06	1.36109e+06	355343		3.02418e+06	3.02843e+06	2.49007e+06	2.84756e+06	252788
	Wt		TG/CC
	Huh-NTCP	Huh-7	Huh-NTCP	Huh-7
DMSO	2.35612e+06	1.81398e+06	1.69588e+06	1.98687e+06
NTZ	1.51099e+06	1.68689e+06	1.47359e+06	2.35745e+06
EGCG	2.1327e+06	2.04258e+06	1.45901e+06	2.84913e+06
Rutin	2.04749e+06	2.59463e+06	1.36109e+06	2.84756e+06
Bacitracin	1.86307e+06	1.74371e+06	1.41616e+06	2.17418e+06
PX-12	1.55801e+06	1.42238e+06	1.34145e+06	2.7181e+06
cell-cell fusion n=4
					mean	std
DMSO	100	100	100	100	100	0
NTZ	20.8297	23.5306	22.1801	19.464	21.5011	1.51499
EGCG	6.59574	6.10836	6.35205	5.05078	6.02673	0.589225
Rutin	100.559	121.162	110.86	131.19	115.943	11.4258
Bacitracin	72.464	79.1836	75.8238	87.9856	78.8642	5.77732
HDV infection inhibition n=4
					mean	std
DMSO	3.32316e+07	5.72194e+07	2.6569e+07	6.42807e+07	4.53252e+07	1.58022e+07
NTZ	8124.2	39476.2	37794.2	40870.6	31566.3	13578.1
EGCG	9288.39	20783.5	11793.2	4495.16	11590.1	5920.24
Rutin	878328	263547	163887	199159	376230	292080
Bacitracin	3.93425e+06	9.49562e+07	3.98347e+06	2.6846e+06	2.63896e+07	3.95904e+07
PX-12	9.37201e+06	2.13234e+06	9.00739e+06	8.77228e+06	7.32101e+06	3.00329e+06
HBV infection inhibition n=3
				mean	std
DMSO	249489	302383	282944	278272	21844.9
NTZ	5481.17	3093.35	6465.27	5013.26	1415.79
EGCG	9288.39	3182.39	7375.61	6615.46	2550.05
Rutin	78327.5	16355.4	47462.8	47381.9	25300.1
Bacitracin	213717	148517	176879	179705	26692.7
PX-12	187839	180164	113544	160516	33361.6
