# Supplementary material for: A fusion peptide in preS1 and the human protein disulfide isomerase ERp57 are involved in hepatitis B virus membrane fusion process
Source: eLife. 2021 Jun 30;10:e64507. doi: 10.7554/eLife.64507 (PMC8282342; doi:10.7554/eLife.64507)
Supplement: Figure 7—source data 1. — The values correspond to the data expressed in the graphs displayed in Figure 7B–D. [file elife-64507-fig7-data1.xlsx]

## Sheet: Figure 7-source data 1
HDV infection					mean	std
ERp46	sh1	7.74695e+06	1.47613e+08	2.28706e+07	5.941e+07	6.26735e+07
	sh2	4.46422e+07	1.14627e+07	2.50992e+07	2.70681e+07	1.36168e+07
ERp57	sh3	306253	113077	388711	269347	115513
	sh4	433677	425375	70989.1	310014	169050
ERp72	sh3/4	1.1453e+07	4.3862e+07	9.08511e+07	4.8722e+07	3.25958e+07
Huh	NTCP	9.85393e+07	1.26646e+08	1.27047e+08	1.17411e+08	1.33451e+07
HBV infection					mean	std
ERp46	sh1	989540	1.47207e+06	1.14245e+06	1.20135e+06	201348
	sh2	614902	1.07933e+06	847835	847355	189602
ERp57	sh3	26400.4	3007.7	37302.3	22236.8	14306.9
	sh4	18552.2	24981.3	21196.1	21576.5	2638.41
ERp72	sh3/4	3.86305e+06	706039	714390	1.76116e+06	1.48627e+06
Huh	NTCP	3.8913e+06	5.40763e+06	4.03283e+06	4.44392e+06	683892
cell-cell fusion					mean	std
		N-tat
ERp46 sh1	pH4	80.9608	75.5851	64.4859	73.6773	6.85982
	pH7	85.2588	76.0654	66.6867	76.0036	7.58215
ERp46 sh2	pH4	102.267	66.2249	81.581	83.3578	14.7678
	pH7	92.2511	70.7523	80.307	81.1035	8.79487
ERp57 sh3	pH4	28.9592	28.7958	40.4641	32.7397	5.46237
	pH7	25.3948	12.5166	39.1346	25.682	10.8686
ERp57 sh4	pH4	23.0766	25.1829	27.4527	25.2374	1.78697
	pH7	19.1665	19.9866	26.3186	21.8239	3.19582
ERp72 sh3/4	pH4	95.6053	84.6277	92.1714	90.8015	4.58507
	pH7	101.887	90.7442	94.6219	95.7512	4.61872
NT	pH4	91.1976	90.3301	91.1383	90.8887	0.395711
	pH7	100	100	100	100	6.56219e-08
Empty	pH4	1.06778	0.429822	5.69616	2.39792	2.3467
	pH7	1.06778	0.429822	5.69616	2.39792	2.3467
		H-tat										N-tat	H-Tat
ERp46 sh1	pH4	103.268	72.8	74.7231	83.5969	13.9315				ERp46 sh1	pH4	73.6773	83.5969
	pH7	102.999	70.7747	63.9003	79.2247	17.0437					pH7	76.0036	79.2247
ERp46 sh2	pH4	83.5907	70.3723	99.3533	84.4387	11.8466				ERp46 sh2	pH4	83.3578	84.4387
	pH7	101.225	70.3726	90.9237	87.5073	12.8252					pH7	81.1035	87.5073
ERp57 sh3	pH4	32.1051	13.0313	39.9379	28.3581	11.2996				ERp57 sh3	pH4	32.7397	28.3581
	pH7	30.7539	16.0704	24.647	23.8238	6.02273					pH7	25.682	23.8238
ERp57 sh4	pH4	23.3074	24.2154	31.788	26.4369	3.80189				ERp57 sh4	pH4	25.2374	26.4369
	pH7	23.7339	25.8952	36.221	28.6167	5.449					pH7	21.8239	28.6167
ERp72 sh3/4	pH4	106.564	84.1037	104.322	98.3299	10.1011				ERp72 sh3/4	pH4	90.8015	98.3299
	pH7	108.16	87.5488	95.831	97.18	8.46847					pH7	95.7512	97.18
NT	pH4	104.266	105.073	94.1389	101.159	4.97515				NT	pH4	90.8887	101.159
	pH7	94.3918	108.425	91.8372	98.2178	7.29218					pH7	100	98.2178
Empty	pH4	1.06778	0.429822	5.69616	2.39792	2.3467				Empty	pH4	2.39792	2.39792
	pH7	1.06778	0.429822	5.69616	2.39792	2.3467					pH7	2.39792	2.39792
Expression shRNA in Huh-NTCP
	ERp57			mean	std
Control	100	100	100	100	0
sh3	6.57996	9.31405	0.130997	5.34167	3.84986
sh4	4.64209	6.12769	7.03445	5.93474	0.986158
											mean	std
	ERp72								ERp46	sh1	51.8021	4.91323
Control	100	100	100	100	0					sh2	33.0279	3.90495
sh3/4	17.0219	21.7555	26.7915	21.8563	3.98908				ERp57	sh3	5.34167	3.84986
sh4/5	33.964	25.0308	28.6193	29.2047	3.67037					sh4	5.93474	0.986158
									ERp72	sh3/4	21.8563	3.98908
	ERp46
Control	100	100	100	100	0
sh1	45.1505	53.3882	56.8677	51.8021	4.91323
sh2	35.503	36.0657	27.515	33.0279	3.90495
