# Supplementary material for: A fusion peptide in preS1 and the human protein disulfide isomerase ERp57 are involved in hepatitis B virus membrane fusion process
Source: eLife. 2021 Jun 30;10:e64507. doi: 10.7554/eLife.64507 (PMC8282342; doi:10.7554/eLife.64507)
Supplement: Figure 9—source data 1. — The values correspond to the data expressed in the graphs displayed in Figure 9B. [file elife-64507-fig9-data1.xlsx]

## Sheet: Figure 9-source data 1
	HBV-DMSO
		P0	P1	P2	P3
	211 / 050	1.93932	2305.3	28305.2	1.00553e+07
	785	309.314	16.4236	282.53	231.242
	722	428.445	926.655	15748.8	5.21363e+06
	532	219.46	7184.99	8.94294e+06	4.22343e+06
	229	95.0366	11606.4	115385	1.45431e+07
	Mean	210.839	4407.96	1.82053e+06	6.80714e+06
	std	151.111	4367.06	3.56143e+06	5.01886e+06
	HBV_NTZ
		P0	P1	P2	P3
	585	59.7345	2135.21	235.299	3.65539e+06
	249	502.313	2748.66	1849.57	8.48064e+06
	711	533.602	237.993	63.954	329323
	509	59.1258	133.822	2243.66	889.262
	232	90.7918	434.283	706.463	1.63493e+06
	Mean	249.114	1137.99	1019.79	2.82024e+06
	std	220.032	1086.49	873.341	3.10793e+06
	NTZ
		P0	P1	P2	P3
	522 / 002	289.143	16.1737	26.4924	51.7389
	377	28.8837	26.2069
	795	47.7871	28.025	57.5936	5.20893
	530	126.373	67.7386
	Mean	123.047	34.5361	42.043	28.4739
	std	102.628	19.6936	15.5506	23.265
	DMSO
		P0	P1	P2	P3
	245	61.8873	31.9026	12.1118
	546	70.1214	79.6138	34.0648	29.011
	510	116.096	10.9127	51.8595	62.9143
	Mean	82.7017	40.8097	32.6787	45.9626
	std	23.8517	28.7456	16.2565	16.9516
		P0	P1	P2	P3
	HBV- DMSO	210.839	4407.96	1.82053e+06	6.80714e+06
	HBV NTZ 100	249.114	1137.99	1019.79	2.82024e+06
	no HBV NTZ 100	123.047	34.5361	42.043	28.4739
	no HBV DMSO	82.7017	40.8097	32.6787	45.9626
