# Supplementary material for: A fusion peptide in preS1 and the human protein disulfide isomerase ERp57 are involved in hepatitis B virus membrane fusion process
Source: eLife. 2021 Jun 30;10:e64507. doi: 10.7554/eLife.64507 (PMC8282342; doi:10.7554/eLife.64507)
Supplement: Supplementary file 1. — The sequences correspond to the oligonucleotides used to generate the lentiviral vectors carrying shRNA against the indicated protein disulfide isomerases (PDIs) in Figure 7 or the hepatitis B virus glycoprotein (HBV GP) mutants described in Figure 2 (preS1 and preS2 mutants) and in Figures 4 and 5 (CSD mutants). [file elife-64507-supp1.xlsx]

## Sheet: Figure 1-figure supplement 1
		Ratio
		N-tat	H-tat
Empty	pH7	1	1
	pH4	1	1
VSV	pH7	3.04268	3.31544
	pH5	16.8209	13.8284
CCHF	pH7	2.99836	2.92695
	pH4	19.9272	23.6979
HBV	pH7	28.6121	29.0579
	pH4	25.2742	28.5652
		Ratio
		N-tat	H-tat
Empty	pH7	1	1
	pH4	1	1
VSV	pH7	3.46124	2.98918
	pH5	17.7086	16.1632
CCHF	pH7	9.35313	8.29035
	pH4	28.0342	30.6139
HBV	pH7	39.087	36.8896
	pH4	37.0732	33.5803
		Ratio
		N-tat	H-tat
Empty	pH7	1	1
	pH4	1	1
VSV	pH7	8.73064	8.59744
	pH5	19.3674	22.1714
CCHF	pH7	13.796	13.6899
	pH4	62.7359	63.1654
HBV	pH7	90.8561	79.1938
	pH4	81.1388	89.7955

## Sheet: Figure 1-figure supplement 2
			Post-incubation						Post-treatment
		time of incubation h	% survie			ecart type			% survie			ecart type
			assay 1	assay 2	MOYENNE	assay 1	assay 2	MOYENNE	assay 1	assay 2	MOYENNE	assay 1	assay 2	MOYENNE
	No cell control		100	100	100	0	0	0	100	100	100	0	0	0
	Untreated cell control		99.533	100	99.7665	0	0	0	97.0161	100	98.508	0	0	0
	Maximum LDH release control		0	0	0	0	0	0	0	0	0	0	0	0
	DMSO	24		100.04	100.04		0.663973	0.663973		99.9239	99.9239		0.715247	0.715247
	PBS	24		101.132	101.132		0.554729	0.554729		101.423	101.423		1.00302	1.00302
	H2O	24		101.343	101.343		0.696929	0.696929		101.586	101.586		0.271674	0.271674
	Heparin 100µg/mL	2	99.9303	100.729	100.33	0.0987433	0.807653	0.453198	98.869	102.765	100.817	0.73525	1.59908	1.16717
	Heparin 200µg/mL	2	100.652	100.635	100.643	0.207894	1.49846	0.853179	99.0699	102.239	100.654	0.714638	1.71964	1.21714
	Heparin 400µg/mL	2	102.404	98.7732	100.588	1.80903	0.543433	1.17623	97.4598	103.025	100.242	0.703152	0.858925	0.781039
	DTNB 0.5mM	24	97.0746	100.611	98.8429	0.0824846	1.77065	0.926568	100.295	100.362	100.329	1.0612	1.30848	1.18484
	DTNB 1mM	24	100.729	99.8013	100.265	0.339167	1.94967	1.14442	100.528	99.6398	100.084	0.218574	0.410846	0.31471
	DTNB 2mM	24	100.169	100.388	100.279	0.281328	1.40876	0.845045	100.595	100.513	100.554	0.991444	0.383606	0.687525
	NTZ 30ug/mL	24	100.115	98.7681	99.4415	0.459818	2.9493	1.70456	96.4078	98.8653	97.6366	0.636566	0.915163	0.775865
	EGCG 5µM	24	99.2973	99.9028	99.6	0.0954606	2.4346	1.26503	99.3326	100.731	100.032	0.104962	0.63239	0.368676
	Rutin 5µM	24	98.9811	102.703	100.842	0.0560307	1.66111	0.858572	99.4344	101.444	100.439	0.436851	0.354715	0.395783
	Bacitracin 5mM	24	92.9672	98.8721	95.9197	1.2108	0.580892	0.895844	95.7415	102.708	99.2247	6.39304	0.574767	3.4839
	PX-12 30µg/mL	24	100.714	88.8502	94.7822	0.48723	1.15784	0.822534	98.7891	99.6044	99.1967	0.657144	2.75361	1.70537
			Post-incubation	Post-treatment
		time of incubation h	% survie	% survie
	No cell control		100	100
	Untreated cell control		99.7665	98.508
	Maximum LDH release control		0	0
	DMSO	24	100.04	99.9239
	PBS	24	101.132	101.423
	H2O	24	101.343	101.586
	Heparin 100µg/mL	2	100.33	100.817
	Heparin 200µg/mL	2	100.643	100.654
	Heparin 400µg/mL	2	100.588	100.242
	DTNB 0.5mM	24	98.8429	100.329
	DTNB 1mM	24	100.265	100.084
	DTNB 2mM	24	100.279	100.554
	NTZ 30ug/mL	24	99.4415	97.6366
	EGCG 5µM	24	99.6	100.032
	Rutin 5µM	24	100.842	100.439
	Bacitracin 5mM	24	95.9197	99.2247
	PX-12 30µg/mL	24	94.7822	99.1967

## Sheet: Figure 1-figure supplement 3
	Virus Production
					Mean	std
	noGP	5132.16	10436.2	9796.79	8455.04	2364.08
	Wt	8.47776e+09	7.26533e+08	9.29963e+09	6.16798e+09	3.86228e+09
	noM	5.88129e+09	3.18597e+09	4.04994e+09	4.3724e+09	1.12373e+09
	Infectivity
					Mean	std
	noGP	1096.48	1431.75	39221.4	13916.5	17893.7
	Wt	9.21963e+07	1.42839e+08	1.07517e+08	1.14184e+08	2.12052e+07
	noM	5.88129e+07	7.18592e+07	1.49941e+06	4.40571e+07	3.05606e+07

## Sheet: Figure 1-figure supplement 4
Total protein expression
					Mean	std
	L	1.00093	0.883231	0.74253	0.875563	0.105629
	M	1.1233	1.13537	0.985321	1.08133	0.0680668
	S	0.97094	0.954186	0.945235	0.956787	0.010654
	noM	1.16242	0.995892	0.863433	1.00725	0.122324
	Wt	1	1	1	1	0
TGCC Total protein expression
					Mean	std
	wt	1	1	1	1	0
	T303C	1.1316	0.838637	0.992435	0.987558	0.119652
	G308C	1.35305	0.968183	1.01803	1.11309	0.170896
	TG/CC	1.17224	0.986463	1.24511	1.1346	0.108894
																		the vertical bars correspond to samples that were not used in the part of the study; therefore the lanes were suppressed in the final figure.

## Sheet: Figure 2-figure supplement 2
Pres1 Total protein expression
					Mean	std
	Wt	1	1	1	1	0
	F52A	0.78298	0.844674	1.11517	0.914276	0.144272
	G53A	0.602874	0.749585	0.960894	0.771118	0.146952
	F56A	0.77343	0.769454	0.918548	0.820477	0.0693655
	W66A	0.874353	0.704857	0.811984	0.797065	0.0699957
	FW/AA	0.766501	0.663192	0.899167	0.776287	0.0965843
	FW/EE	0.749685	0.764384	0.895845	0.803304	0.0657106
Pres2 Total protein expression
					Mean	std
	Wt	1	1	1	1	0
	Y129A	0.936339	0.734229	0.862127	0.844232	0.0834755
	F130A	0.685933	0.791303	0.895515	0.790917	0.0855618
	S136E	0.831954	0.696657	0.953428	0.827346	0.104877
	L144A	0.908531	0.694487	0.956614	0.853211	0.113939

## Sheet: Figure 3-figure supplement 1
	Infectivity in DTNB at 0h and 16h
		20190506	20190620	20190805	20200804	20200807	mean	std
		0H
	0 mM	646221	2.04222e+06	1.66329e+06	1.754e+06	2.10608e+06	1.64236e+06	525379
	0.125 mM	432015			637338	1.22777e+06	765707	337307
	0.25 mM	83479.1			329707	333959	249048	117088
	0.5 mM	42321.9			126956	227199	132159	75565.2
	1 mM	4707.94	4837.02	5672.63	39516.9	35563.9	18059.7	15958.4
		20190506	20190620	20190805	20200804	20200807	mean	std
		16H
	0 mM	616039	2.04222e+06	1.66329e+06	1.24891e+06	1.95471e+06	1.50503e+06	523781
	0.125 mM	506470			2.74128e+06	1.43142e+06	1.55972e+06	916858
	0.25 mM	240336			1.79535e+06	3.66876e+06	1.90148e+06	1.40166e+06
	0.5 mM	809231			1.94869e+06	2.65698e+06	1.80497e+06	761155
	1 mM	845360	1.10407e+06	1.33378e+06	1.74575e+06	1.33064e+06	1.27192e+06	297293
		mean		STD
	DTNB	0H	16H	0H	16H
	0 mM	1.64236e+06	1.50503e+06	525379	523781
	0.125 mM	765707	1.55972e+06	337307	916858
	0.25 mM	249048	1.90148e+06	117088	1.40166e+06
	0.5 mM	132159	1.5622e+06	75565.2	1.0866e+06
	1 mM	18059.7	1.11976e+06	15958.4	557508

## Sheet: Figure 9-figure supplement 1
	kinetics inhnitors
			mean		std
			DMSO	NTZ	DMSO	NTZ
	2019.10.09	2h-	1.93532e+06	72774.6	11140.9	26178.9
	2019.09.24	0h	1.55665e+06	37164.1	39224	27542.7
	2019.10.09	4h+	4.27448e+06	5.00862e+06	8.59253e+06	276880
	2019.08.20	16h+	3.46837e+06	3.55598e+06	1.88249e+06	1.23134e+06
	HBV-DMSO
		P0	P1	P2	P3
	211 / 050	1.93932	2305.3	28305.2	1.00553e+07
	785	309.314	16.4236	282.53	231.242
	722	428.445	926.655	15748.8	5.21363e+06
	532	219.46	7184.99	8.94294e+06	4.22343e+06
	229	95.0366	11606.4	115385	1.45431e+07
	Mean	210.839	4407.96	1.82053e+06	6.80714e+06
	std	151.111	4367.06	3.56143e+06	5.01886e+06
	HBV_NTZ
		P0	P1	P2	P3
	585	59.7345	2135.21	235.299	3.65539e+06
	249	502.313	2748.66	1849.57	8.48064e+06
	711	533.602	237.993	63.954	329323
	509	59.1258	133.822	2243.66	889.262
	232	90.7918	434.283	706.463	1.63493e+06
	Mean	249.114	1137.99	1019.79	2.82024e+06
	std	220.032	1086.49	873.341	3.10793e+06
	NTZ
		P0	P1	P2	P3
	522 / 002	289.143	16.1737	26.4924	51.7389
	377	28.8837	26.2069
	795	47.7871	28.025	57.5936	5.20893
	530	126.373	67.7386
	Mean	123.047	34.5361	42.043	28.4739
	std	102.628	19.6936	15.5506	23.265
	DMSO
		P0	P1	P2	P3
	245	61.8873	31.9026	12.1118
	546	70.1214	79.6138	34.0648	29.011
	510	116.096	10.9127	51.8595	62.9143
	Mean	82.7017	40.8097	32.6787	45.9626
	std	23.8517	28.7456	16.2565	16.9516
